# Supplementary material for: bigPint: A Bioconductor visualization package that makes big data pint-sized
Source: PubMed Central journal article supplement (PMC7347224; doi:10.1371/journal.pcbi.1007912), 2020-06-15
Supplement: pcbi.1007912.s001.pdf [file pcbi.1007912.s001.pdf]

**S1 Table.** Resources for developers about bigPint interactive graphics

| Plot                | Pseudocode    | Code                                                    |
|---------------------|---------------|---------------------------------------------------------|
| Scatterplot matrix  | S1 Pseudocode | <a href="https://bit.ly/spmCode">bit.ly/spmCode</a>     |
| Litre plot          | S2 Pseudocode | <a href="https://bit.ly/litreCode">bit.ly/litreCode</a> |
| Volcano plot        | S3 Pseudocode | <a href="https://bit.ly/volcCode">bit.ly/volcCode</a>   |
| Parallel coordinate | S4 Pseudocode | <a href="https://bit.ly/pcpCode">bit.ly/pcpCode</a>     |

**Note:** The pseudocode and code provided in supplementary material is intended for *developers* who wish to understand the details of how we created the double-layered interactivity and possibly repurpose and modify these fairly new technology for new software. Biology researchers who wish to use the bigPint package should instead consult the bigPint package website (<https://lindsayrutter.github.io/bigPint>) and the associated manuscripts.
