# Supplementary material for: bigPint: A Bioconductor visualization package that makes big data pint-sized
Source: PubMed Central journal article supplement (PMC7347224; doi:10.1371/journal.pcbi.1007912), 2020-06-15
Supplement: pcbi.1007912.s002.pdf [file pcbi.1007912.s002.pdf]

**Data:** Data frame input by user

**Result:** Interactive scatterplot matrix

```
/* Declare Shiny server
server ← function(input, output, session){
  /* Declare Shiny output scatterplot matrix
  output$scatMatPlot ← renderPlotly({
    /* Draw hexagons and x=y line in bottom-left corner of matrix
    my_fn ← function(data, mapping){
      /* Create static scatterplot matrix
      p ← ggpairs(data, lower = list(continuous = my_fn))
      /* Convert ggplot2::ggplot() object to plotly object
      ggP ← ggplotly(p)
      /* Tailor plotly scatterplot matrix interactivity with JavaScript
      ggPR ← ggP %>% onRender("function(el, x, data){
        /* If the user clicks on the plotly scatterplot matrix object
        el.on('plotly_click', function(e){
          /* Delete any old superimposed plotly geoms (orange dots)
          if (x.data.length > 0){Plotly.deleteTraces(el.id)}
          /* Determine gene IDs selected by user click. Save as object called selID with handle called 'selID' so it
             can be read outside current JavaScript function back in Shiny
          Shiny.onInputChange('selID', selID)
          /* Create traces for selected gene IDs as orange points that state gene names upon hovering
          trace = {mode: 'markers', color: 'orange', size: 6, text: selID, hoverinfo: 'text'}
          /* Superimpose traces onto the plotly scatterplot matrix object
          Plotly.addTraces(el.id, Traces)
        })
      })
      /* Pass the R data object into the JavaScript function
      ", data = data
    })
  /* Read into Shiny the gene IDs that user clicked on
  selID ← reactive(input$selID)
  /* Create data subset (read counts) for only the selected gene IDs
  pcpDat ← reactive(data[which(data$ID %>% selID()), ])
  /* Create static box plot of the full dataset
  BP ← ggplot(data) + geom_boxplot()
  /* Render boxplot interactive as a plotly object
  ggBP ← ggplotly(BP)
  /* Declare Shiny output boxplot
  output$boxPlot ← renderPlotly({
    /* Tailor interactivity of the plotly boxplot object using custom JavaScript
    ggBP %>% onRender("function(el, x, data){
      /* Create traces for selected gene IDs as orange lines that state gene names upon hovering
      trace = {mode: 'lines', color: 'orange', width: 1.5, text: selID, hoverinfo: 'text'}
      /* Push traces to be superimposed onto the plotly scatterplot matrix object
      Plotly.addTraces(el.id, Traces)
      /* Pass R objects into the JavaScript function
      }", data = list(pcpDat = pcpDat())
    })
  })
}
```

**S1 Pseudocode:** Pseudocode for interactive scatterplot matrix
