# Supplementary material for: bigPint: A Bioconductor visualization package that makes big data pint-sized
Source: PubMed Central journal article supplement (PMC7347224; doi:10.1371/journal.pcbi.1007912), 2020-06-15
Supplement: pcbi.1007912.s004.pdf [file pcbi.1007912.s004.pdf]

**Data:** Data frame input by user

**Result:** Interactive volcano plot

*/\* Declare Shiny server*

```
server ← function(input, output, session){
```

```
  /* Shiny user input options
```

```
  /* Define largest fold change dynamically based on data
```

```
  fcInMax ← max(ldply(dataMetrics, rbind)[["logFC"]])
```

```
  /* Construct dynamic input Shiny slider for fold change
```

```
  output$slider ← renderUI(sliderInput("logFC", "Log fold change:", min=0, max=fcInMax, step=0.1))
```

```
  /* Declare shiny output volcano plot
```

```
  output$volPlot ← renderPlotly({
```

```
    /* Create reactive expression of plotly background volcano plot
```

```
    gP ← reactive(p ← ggplot(data); gP ← ggplotly(p))
```

```
    /* Create reactive expression of plotly background volcano plot
```

```
    plotlyVol ← reactive(gP())
```

```
    /* Tailor interactivity of the plotly volcano plot object using custom JavaScript
```

```
    plotlyVol() %>% onRender("function(el, x, data){
```

```
      /* Read handle called 'points' to obtain variables sent from R into JavaScript
```

```
      Shiny.addCustomMessageHandler('points', function(drawPoints){
```

```
        /* Delete any old superimposed plotly geoms (dots)
```

```
        if (x.data.length > 0){Plotly.deleteTraces(el.id)}
```

```
        /* Create traces for selected gene IDs as points that state gene names upon hovering
```

```
        trace = {x: drawPoints.geneX, y: drawPoints.geneY, mode: 'markers', color: drawPoints.pointColor, size: drawPoints.pointSize, text: drawPoints.geneID, hoverinfo: 'text'}
```

```
        /* Superimpose traces onto the plotly volcano plot object
```

```
        Plotly.addTraces(el.id, trace)
```

```
      })
```

```
    })
```

```
  })
```

```
  /* If the user changes their input, store information about new superimposed genes with a handle called 'points'.
```

```
  These values can then be sent from R to JavaScript
```

```
  observe({session$sendCustomMessage(type = "points", message=list(geneX=geneX, geneY=geneY, pointSize = pointSize, geneID=geneID, pointColor=pointColor))})
```

```
  /* Declare Shiny output boxplot
```

```
  output$boxPlot ← renderPlotly({
```

```
    /* Create reactive expression of plotly background boxplot
```

```
    BP ← reactive(ggplot() + geom_boxplot())
```

```
    ggBP ← reactive(ggplotly(BP()))
```

```
    /* Tailor interactivity of the plotly boxplot object using custom JavaScript
```

```
    ggBP() %>% onRender("function(el, x, data){
```

```
      /* Read handle called 'lines' to obtain variables sent from R into JavaScript
```

```
      Shiny.addCustomMessageHandler('lines', function(drawLines){
```

```
        /* Delete any old superimposed plotly geoms (lines)
```

```
        Plotly.deleteTraces(el.id, traceLine)
```

```
        /* Create xArr and yArr, array of x and y values for superimposed lines, from drawLines
```

```
        /* Create traces for selected gene IDs as lines that state gene names upon hovering
```

```
        traceLine = {x: xArr, y: yArr, mode: 'lines', color: drawLines.pointColor, width: 2, opacity: 0.9; text: drawLines.geneID, hoverinfo: 'text'}
```

```
        /* Superimpose traces onto the plotly volcano plot object
```

```
        Plotly.addTraces(el.id, traceLine)
```

```
      })
```

```
    })
```

```
  })
```

```
  /* If the user changes their input, store information about new superimposed genes with a handle called 'lines'.
```

```
  These values can then be sent from R to JavaScript
```

```
  observe({session$sendCustomMessage(type = "lines", message=list(geneID=geneID, pointColor=pointColor))})
```

```
}
```

### S3 Pseudocode: Pseudocode for interactive volcano plot
